# Supplementary material for: Ten years of tracking mental health in refugee primary health care settings: an updated analysis of data from UNHCR’s Health Information System (2009–2018)
Source: PubMed Central journal article supplement (PMC9109385; doi:10.1186/s12916-022-02371-8), 2022-05-16
Supplement: 12916_2022_2371_MOESM1_ESM.pdf [file 12916_2022_2371_MOESM1_ESM.pdf]

# Health Information System

Reporting Form

Organisation: \_\_\_\_\_

Location: \_\_\_\_\_

## 3.0 Morbidity

Reporting period: \_\_\_\_\_

### 3.6 Mental illness

(enter New and Revisits)

|                                                 | Refugee |   |        |   |         |   |      |   | National |   |
|-------------------------------------------------|---------|---|--------|---|---------|---|------|---|----------|---|
|                                                 | 0 - 4   |   | 5 - 17 |   | 18 - 59 |   | ≥ 60 |   | M        | F |
|                                                 | M       | F | M      | F | M       | F | M    | F |          |   |
| 1. Epilepsy / seizures                          |         |   |        |   |         |   |      |   |          |   |
| 2. Alcohol or other substance use disorder      |         |   |        |   |         |   |      |   |          |   |
| 3. Mental retardation / intellectual disability |         |   |        |   |         |   |      |   |          |   |
| 4. Psychotic disorder                           |         |   |        |   |         |   |      |   |          |   |
| 5. Severe emotional disorder                    |         |   |        |   |         |   |      |   |          |   |
| 6. Other psychological complaint                |         |   |        |   |         |   |      |   |          |   |
| 7. Medically unexplained somatic complaint      |         |   |        |   |         |   |      |   |          |   |
